# Supplementary material for: Effects of the Toxic Non-Protein Amino Acid β-Methylamino-L-Alanine (BMAA) on Intracellular Amino Acid Levels in Neuroblastoma Cells
Source: MDPI journal article supplement (doi:10.3390/toxins15110647), 2023-11-09
Supplement: s1 [file s1]

# Supplementary Materials: Effects of the Toxic Non-Protein Amino Acid $\beta$ -Methylamino-L-Alanine (BMAA) on Intracellular Amino Acid Levels in Neuroblastoma Cells

Jake P. Violi, Lisa Pu, Sercan Pravadali-Cekic, David P. Bishop, Connor R. Phillips and Kenneth J. Rodgers

**Table S1.** Limit of Detection (LOD), Limit of Quantification (LOQ), and Multiple Reaction Monitoring (MRM) transitions for all amino acids analysed in this study. \*denotes the internal standard.

| Amino acid    | Collision<br>energy (eV) | MRM transitions<br>(m/z)    | LOD<br>(ng/ mL) | LOQ<br>(ng/mL) |
|---------------|--------------------------|-----------------------------|-----------------|----------------|
| Alanine       | -29.40                   | 131.10 $\rightarrow$ 44.15  | 0.02            | 0.05           |
|               | -8.80                    | $\rightarrow$ 90.15         |                 |                |
| Arginine      | -22.00                   | 175.20 $\rightarrow$ 70.15  | 1.89            | 5.72           |
|               | -12.00                   | $\rightarrow$ 60.15         |                 |                |
| Asparagine    | -13.80                   | 174.10 $\rightarrow$ 87.15  | 0.73            | 2.19           |
|               | -9.80                    | $\rightarrow$ 133.10        |                 |                |
| Aspartic acid | -22.10                   | 175.10 $\rightarrow$ 74.10  | 0.98            | 2.99           |
|               | -9.20                    | $\rightarrow$ 134.20        |                 |                |
| BMAA          | -17.00                   | 119.10 $\rightarrow$ 44.10  | 0.38            | 1.17           |
|               | -15.00                   | $\rightarrow$ 88.10         |                 |                |
| Cysteine      | -29.40                   | 163.10 $\rightarrow$ 59.25  | 0.58            | 1.77           |
|               | -8.80                    | $\rightarrow$ 122.15        |                 |                |
| Glutamic acid | -16.00                   | 148.10 $\rightarrow$ 84.10  | 1.49            | 4.51           |
|               | -21.90                   | 189.10 $\rightarrow$ 84.10  |                 |                |
| Glutamine     | -20.00                   | 147.10 $\rightarrow$ 84.10  | 0.47            | 1.44           |
|               | -14.00                   | $\rightarrow$ 130.10        |                 |                |
| Glycine       | -17.90                   | 117.20 $\rightarrow$ 76.20  | 3.14            | 9.52           |
|               | -7.20                    | $\rightarrow$ 30.15         |                 |                |
| Histidine     | -15.00                   | 156.15 $\rightarrow$ 110.15 | 4.80            | 14.55          |
|               | -28.00                   | $\rightarrow$ 82.15         |                 |                |
| Isoleucine    | -15.40                   | 173.20 $\rightarrow$ 86.25  | 0.03            | 0.09           |
|               | -8.80                    | $\rightarrow$ 132.20        |                 |                |
| Leucine       | -15.40                   | 173.20 $\rightarrow$ 86.25  | 0.02            | 0.06           |
|               | -8.80                    | $\rightarrow$ 132.20        |                 |                |
| Lysine        | -14.00                   | 147.20 $\rightarrow$ 67.10  | 2.86            | 8.67           |
|               | -30.00                   | $\rightarrow$ 84.15         |                 |                |
| Methionine    | -30.30                   | 191.10 $\rightarrow$ 61.20  | 0.19            | 0.58           |
|               | -7.80                    | $\rightarrow$ 150.15        |                 |                |
| Norvaline*    | -16.90                   | 159.10 $\rightarrow$ 72.05  | 0.02            | 0.06           |
|               | -8.20                    | $\rightarrow$ 118.20        |                 |                |

|               |        |                 |      |      |
|---------------|--------|-----------------|------|------|
| Phenylalanine | -14.00 | 207.10 → 120.15 | 0.03 | 0.10 |
|               | -8.70  | → 166.20        |      |      |
| Proline       | -24.10 | 157.00 → 70.10  | 0.02 | 0.05 |
|               | -9.80  | → 116.20        |      |      |
| Serine        | -28.30 | 147.15 → 60.15  | 0.11 | 0.32 |
|               | -17.60 | → 42.15         |      |      |
| Threonine     | -16.90 | 161.10 → 74.20  | 0.19 | 0.58 |
|               | -9.20  | → 120.20        |      |      |
| Tryptophan    | -6.70  | 246.10 → 72.05  | 0.18 | 0.56 |
|               | -22.90 | → 118.20        |      |      |
| Tyrosine      | -35.10 | 223.10 → 182.20 | 0.07 | 0.21 |
|               | -6.70  | → 91.05         |      |      |
| Valine        | -16.90 | 159.10 → 72.05  | 0.05 | 0.16 |
|               | -27.30 | → 118.20        |      |      |

---

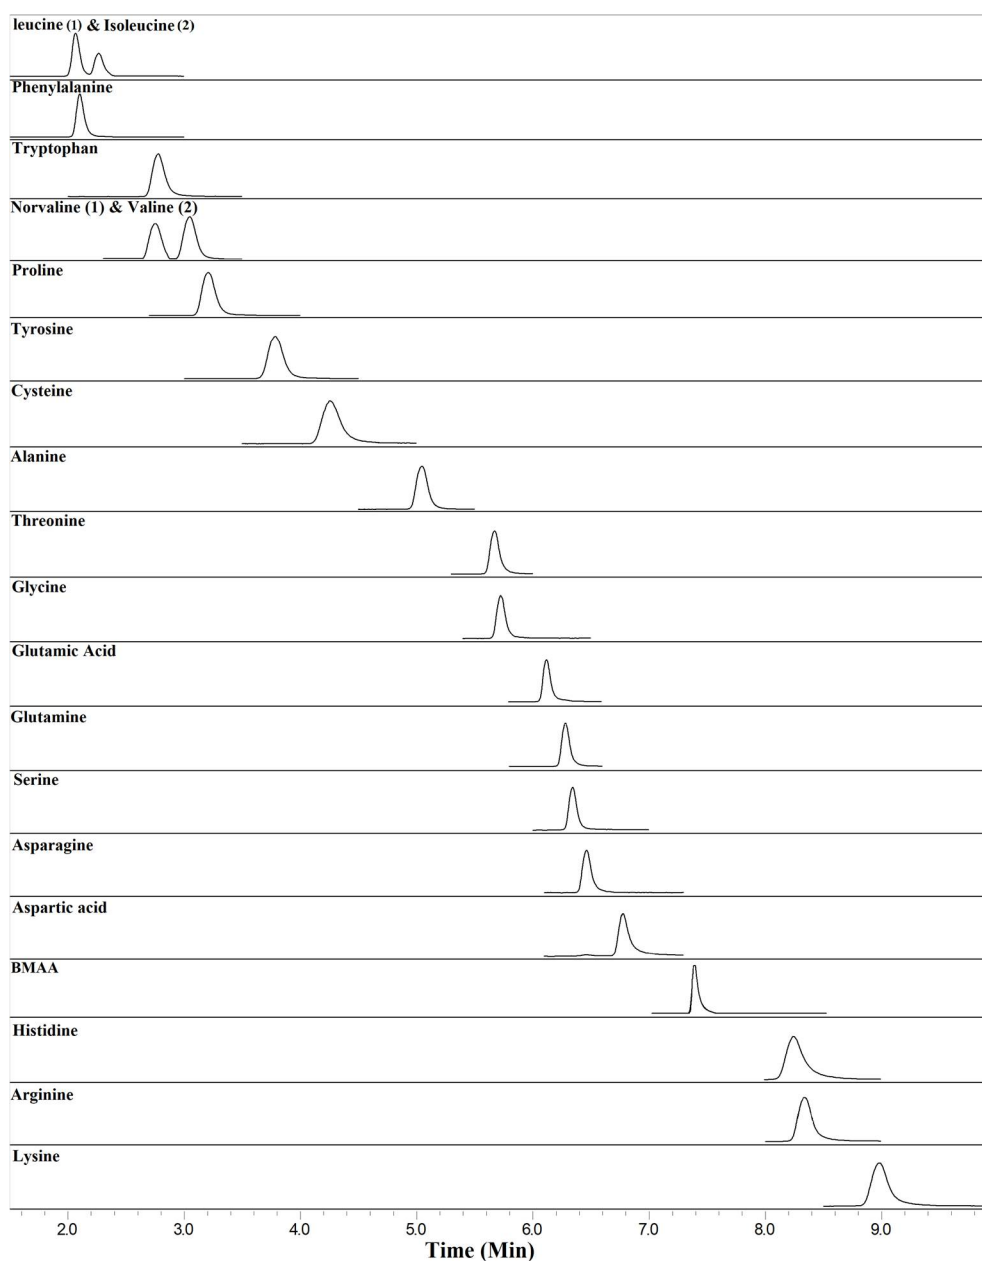

**Figure S1.** Total ion chromatograms (TICs) for each amino acid analysed.

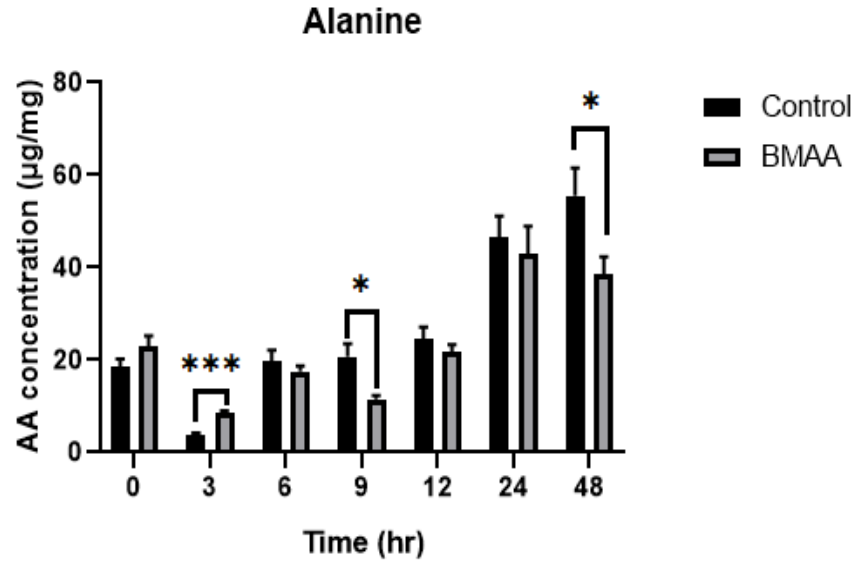

**Figure S2.** Intracellular concentrations of alanine for control and BMAA-treated cells (n = 6). Error bars denote the standard error of the mean (SEM). \* Denotes a *p*-value of < 0.05, \*\* denotes a *p*-value of <0.005, and \*\*\* denotes a *p*-value of <0.0005.

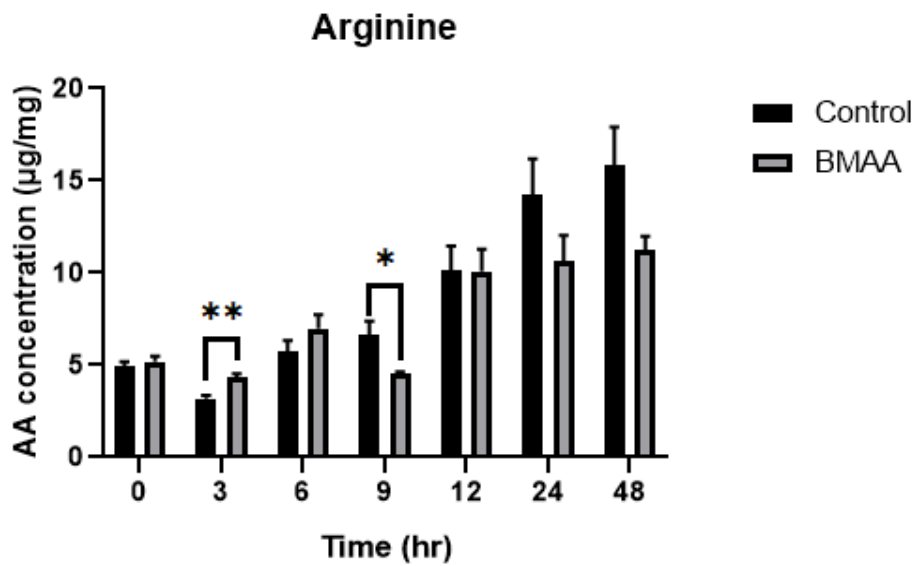

**Figure S3.** Intracellular concentrations of arginine for control and BMAA-treated cells (n = 6). Error bars denote the standard error of the mean (SEM). \* Denotes a *p*-value of < 0.05 and \*\* denotes a *p*-value of <0.005.

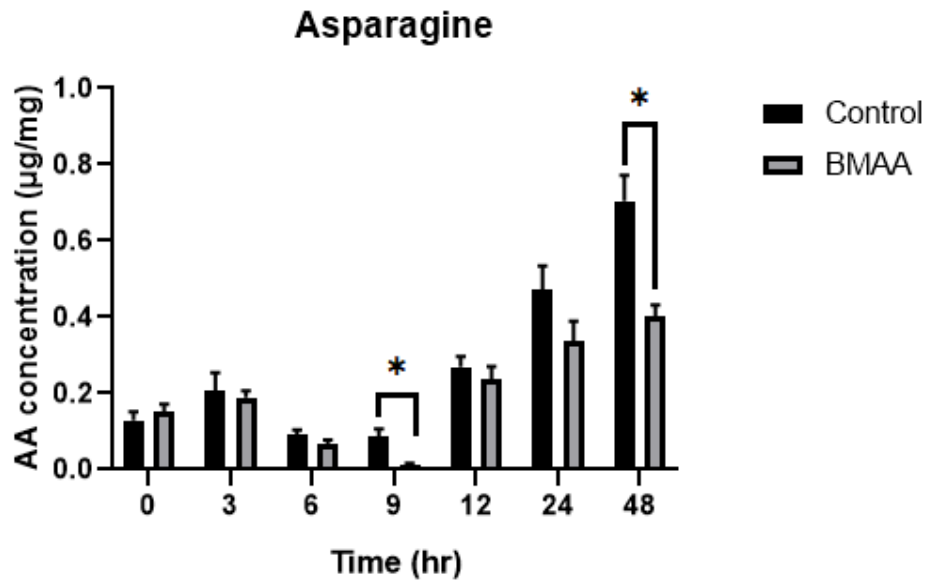

**Figure S4.** Intracellular concentrations of asparagine for control and BMAA-treated cells (n = 6). Error bars denote the standard error of the mean (SEM). \* Denotes a *p*-value of < 0.05.

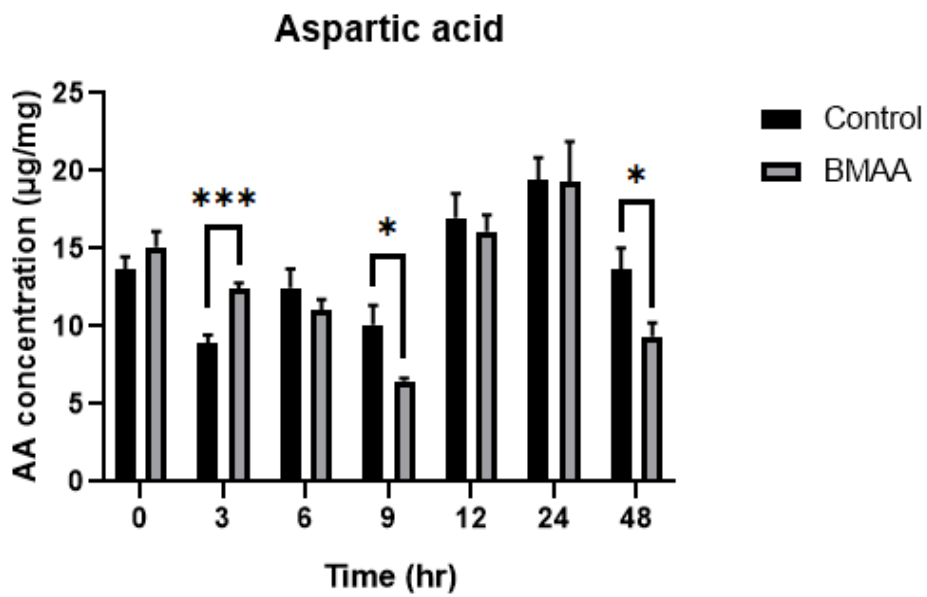

**Figure S5.** Intracellular concentrations of aspartic acid for control and BMAA-treated cells (n = 6). Error bars denote the standard error of the mean (SEM). \* Denotes a *p*-value of < 0.05, \*\* denotes a *p*-value of < 0.005, and \*\*\* denotes a *p*-value of < 0.0005.

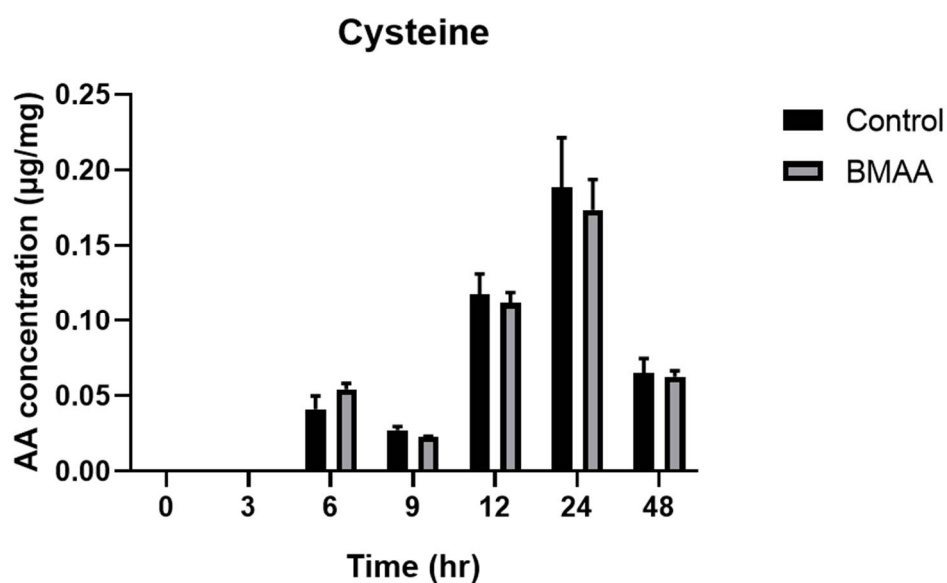

**Figure S6.** Intracellular concentrations of cysteine for control and BMAA-treated cells ( $n = 6$ ). Error bars denote the standard error of the mean (SEM).

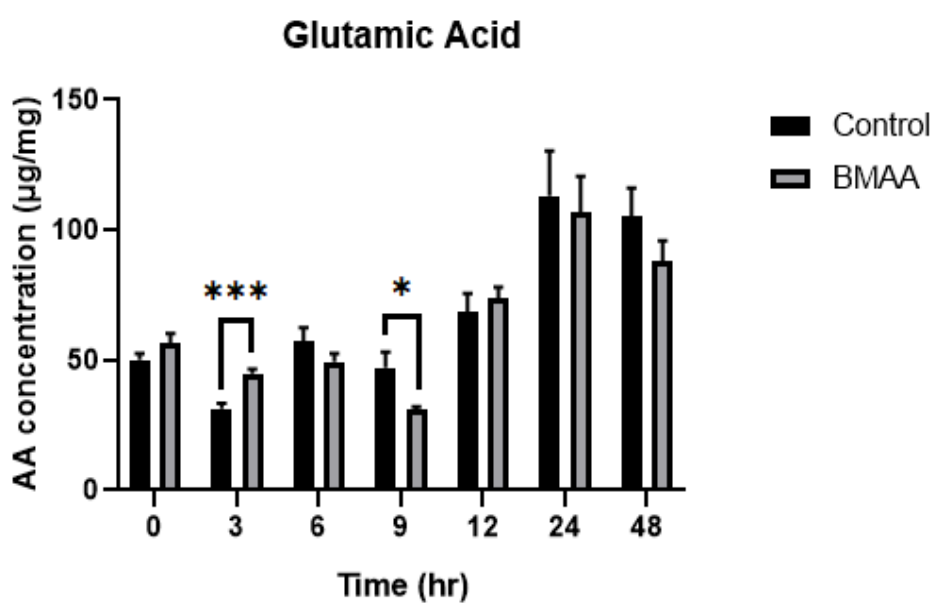

**Figure S7.** Intracellular concentrations of glutamic acid for control and BMAA-treated cells ( $n = 6$ ). Error bars denote the standard error of the mean (SEM). \* Denotes a  $p$ -value of  $< 0.05$ , \*\* denotes a  $p$ -value of  $< 0.005$ , and \*\*\* denotes a  $p$ -value of  $< 0.0005$ .

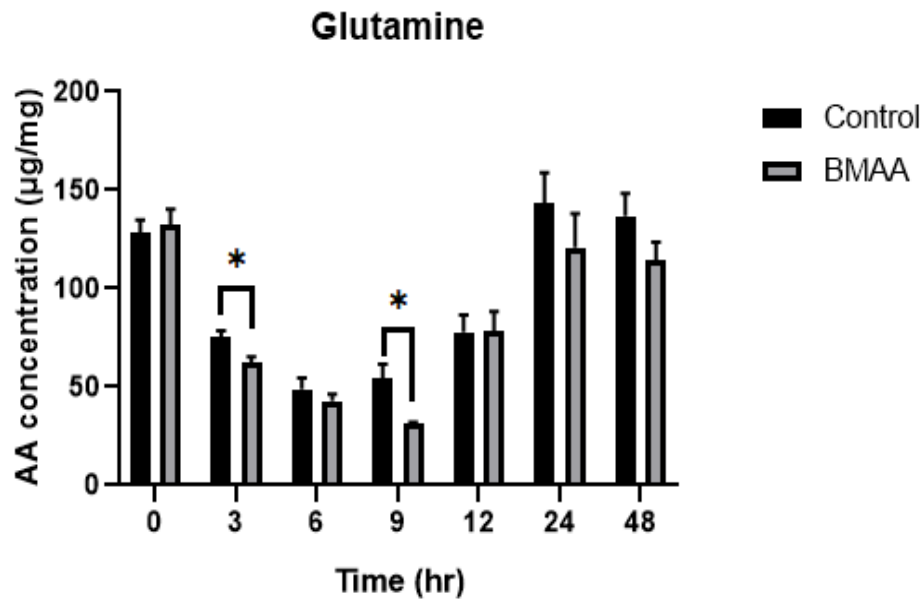

**Figure S8.** Intracellular concentrations of glutamine for control and BMAA-treated cells (n = 6). Error bars denote the standard error of the mean (SEM). \* Denotes a *p*-value of < 0.05.

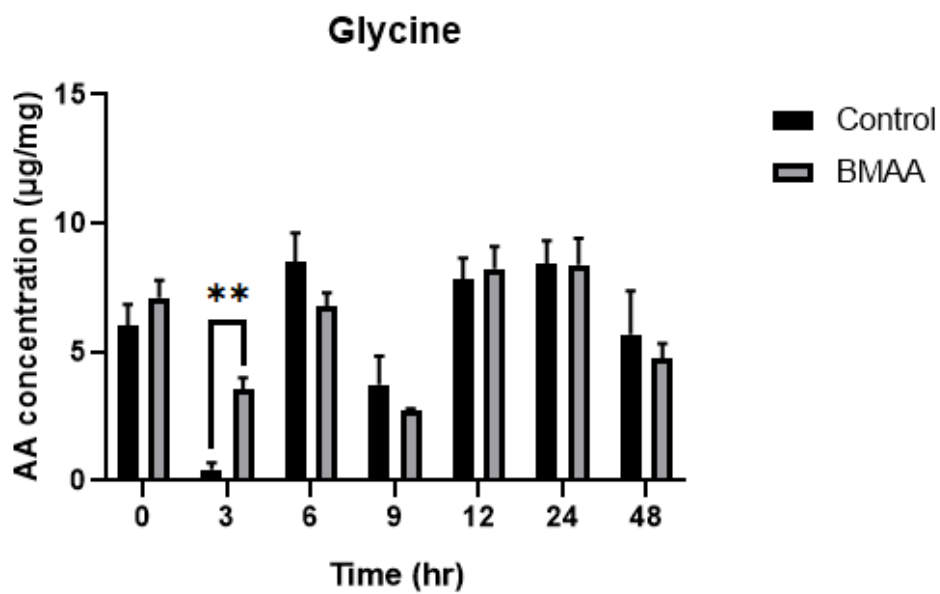

**Figure S9.** Intracellular concentrations of glycine for control and BMAA-treated cells (n = 6). Error bars denote the standard error of the mean (SEM). \* Denotes a *p*-value of < 0.05 and \*\* denotes a *p*-value of < 0.005.

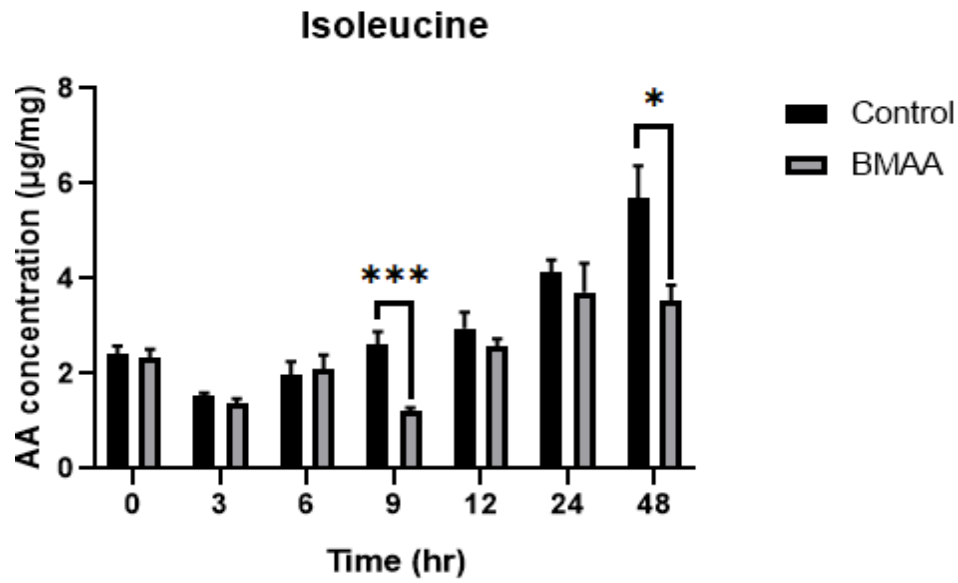

**Figure S10.** Intracellular concentrations of isoleucine for control and BMAA-treated cells (n = 6). Error bars denote the standard error of the mean (SEM). \* Denotes a *p*-value of < 0.05, \*\* denotes a *p*-value of < 0.005, and \*\*\* denotes a *p*-value of < 0.0005.

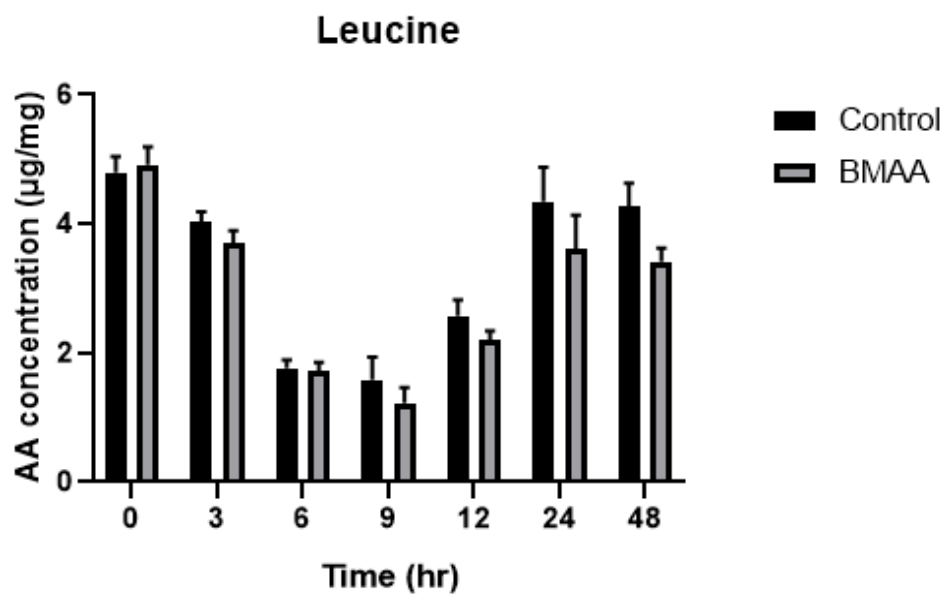

**Figure S11.** Intracellular concentrations of leucine for control and BMAA-treated cells (n = 6). Error bars denote the standard error of the mean (SEM).



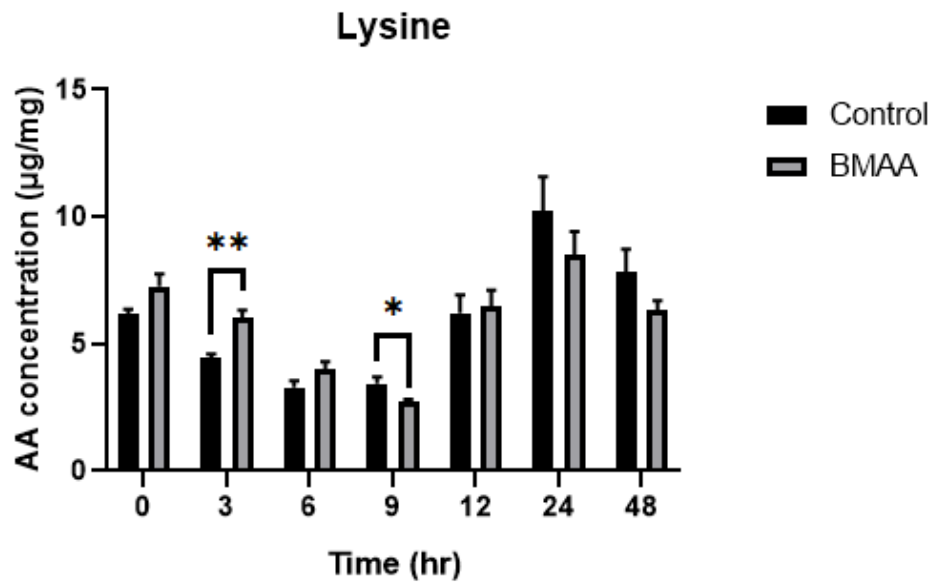

**Figure S12.** Intracellular concentrations of lysine for control and BMAA-treated cells (n = 6). Error bars denote the standard error of the mean (SEM). \* Denotes a *p*-value of < 0.05 and \*\* denotes a *p*-value of < 0.005.

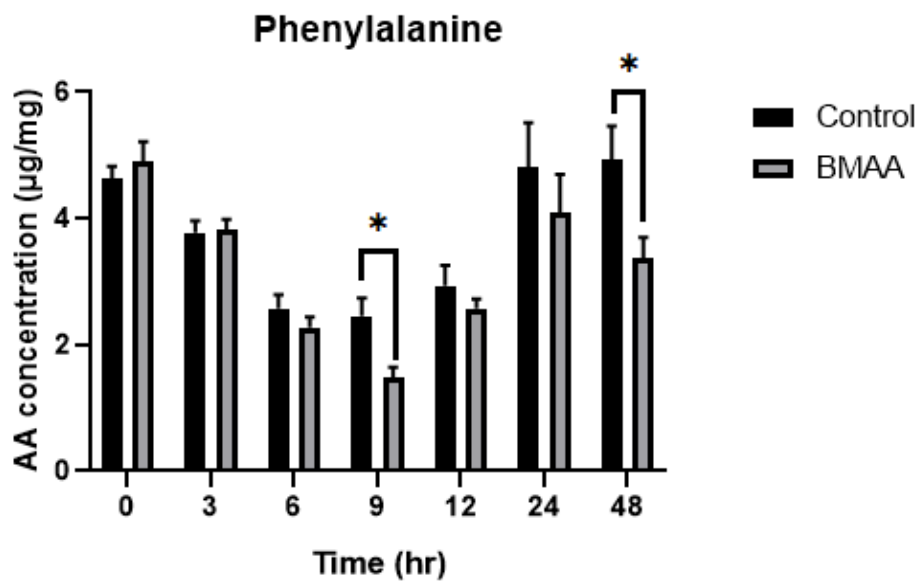

**Figure S13.** Intracellular concentrations of phenylalanine for control and BMAA-treated cells (n = 6). Error bars denote the standard error of the mean (SEM). \* Denotes a *p*-value of < 0.05.

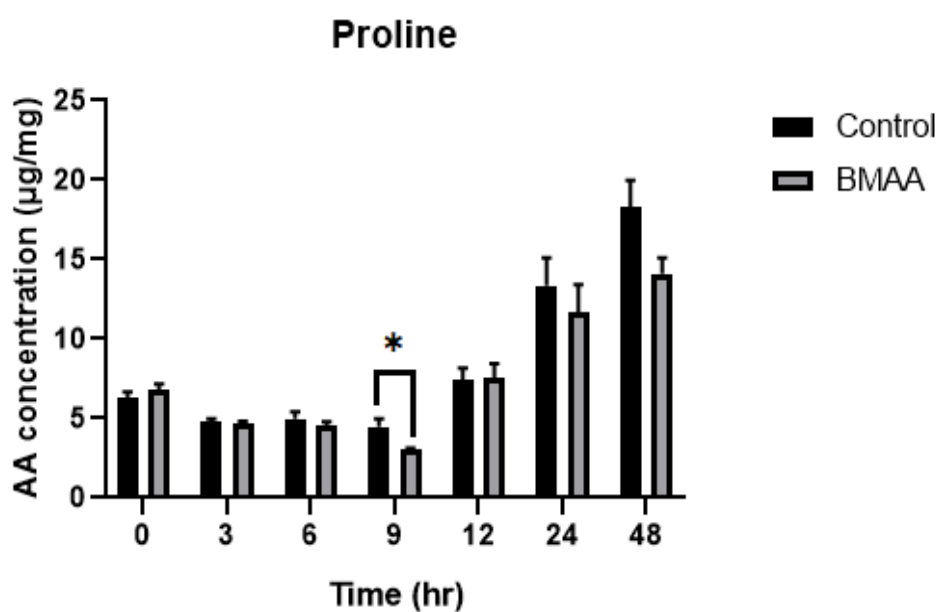

**Figure S14.** Intracellular concentrations of proline for control and BMAA-treated cells (n = 6). Error bars denote the standard error of the mean (SEM). \* Denotes a *p*-value of < 0.05.

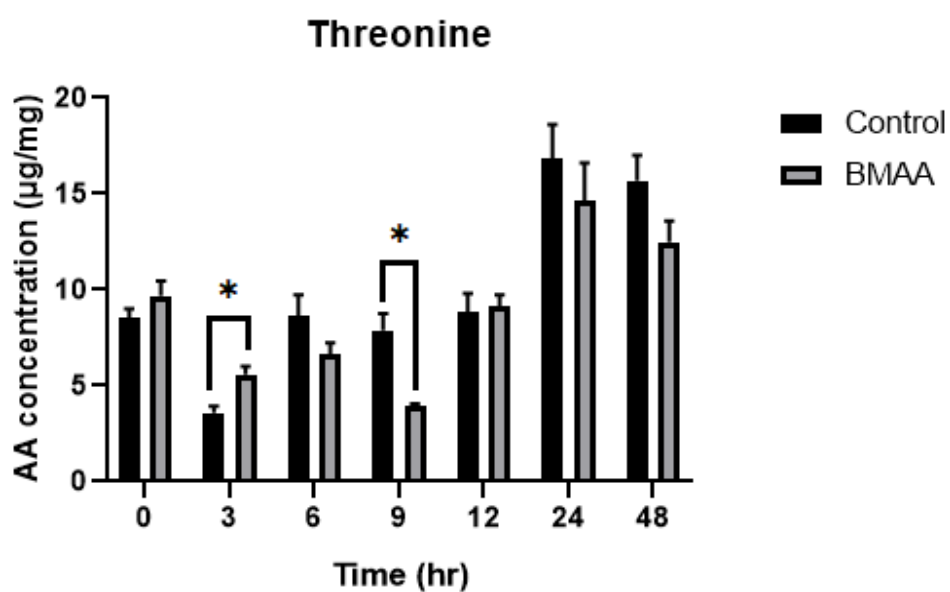

**Figure S15.** Intracellular concentrations of threonine for control and BMAA-treated cells (n = 6). Error bars denote the standard error of the mean (SEM). \* Denotes a *p*-value of < 0.05.

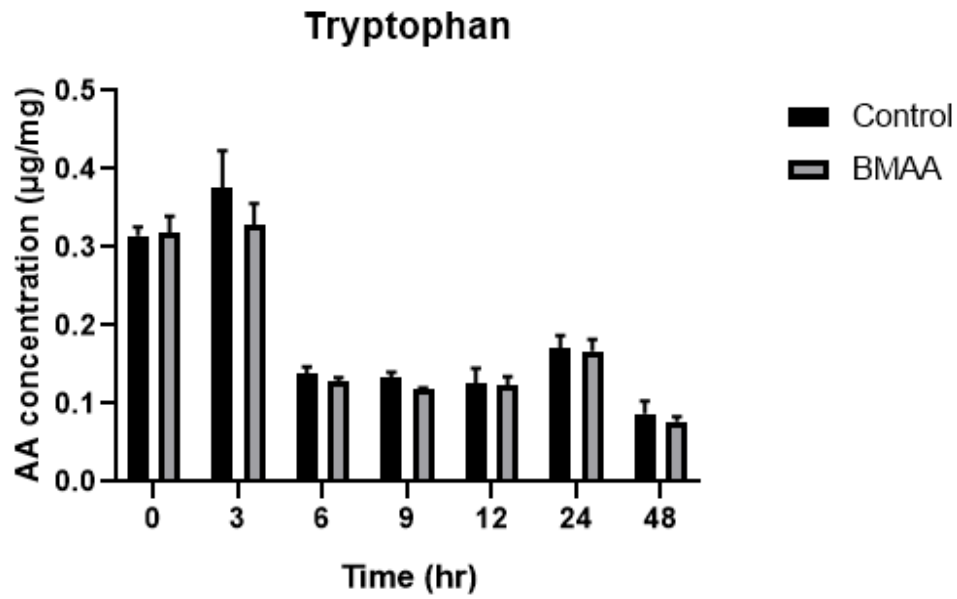

**Figure S16.** Intracellular concentrations of tryptophan for control and BMAA-treated cells (n = 6). Error bars denote the standard error of the mean (SEM).

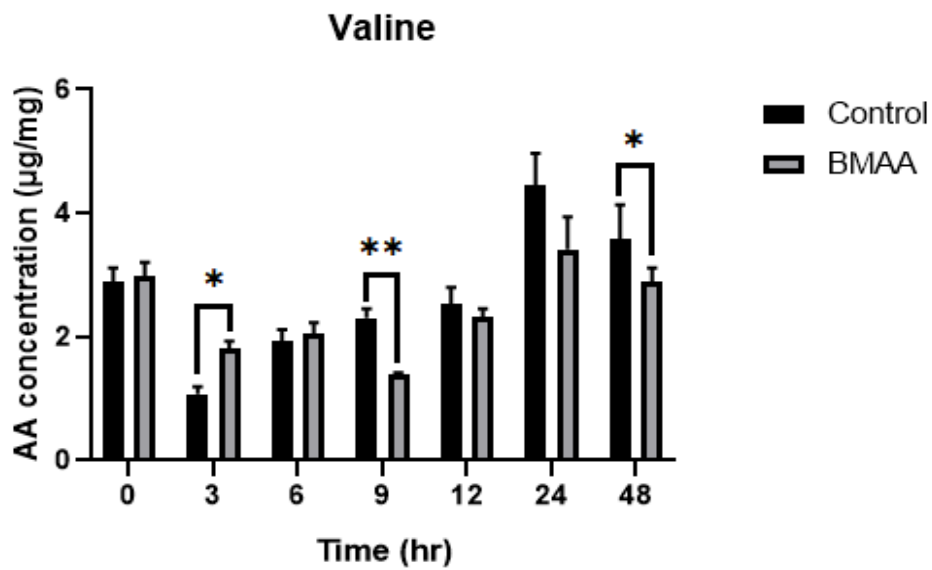

**Figure S17.** Intracellular concentrations of valine for control and BMAA-treated cells (n = 6). Error bars denote the standard error of the mean (SEM). \* Denotes a *p*-value of < 0.05 and \*\* denotes a *p*-value of < 0.005.

**Table S2.** Amino acid content of the culture medium used in the studies (ThermoFisher 11090081). \*L-glutamine was freshly added before use from a 200 mM solution diluted 1 in 100.

| Amino acid                                 | mg/L | mM    |
|--------------------------------------------|------|-------|
| L-Arginine hydrochloride                   | 126  | 0.597 |
| L-Cystine-2HCl                             | 31   | 0.099 |
| *L-Glutamine                               |      | 2.0   |
| L-Histidine hydrochloride-H <sub>2</sub> O | 42   | 0.2   |
| L-Isoleucine                               | 52   | 0.397 |
| L-Leucine                                  | 52   | 0.397 |
| L-Lysine hydrochloride                     | 73   | 0.397 |
| L-Methionine                               | 15   | 0.101 |
| L-Phenylalanine                            | 32   | 0.194 |
| L-Threonine                                | 48   | 0.403 |
| L-Tryptophan                               | 10   | 0.049 |
| L-Tyrosine disodium salt dihydrate         | 52   | 0.199 |
| L-Valine                                   | 46   | 0.393 |
